RESEARCH ARTICLE

# High seroprevalence of hepatitis E virus in the ethnic minority populations in Yunnan, China

Yue Feng<sup>1</sup>✉, Yue-Mei Feng<sup>2,3</sup>✉, Songmei Wang<sup>2,3</sup>, Fang Xu<sup>2,3</sup>, Xuehui Zhang<sup>2,3</sup>, Chunyue Zhang<sup>1</sup>, Yuanyuan Jia<sup>1</sup>, Wanru Yang<sup>1</sup>, Xueshan Xia<sup>1\*</sup>, Jianzhong Yin<sup>2,3\*</sup>

**1** Faculty of Life Science and Technology, Kunming University of Science and Technology, Kunming, Yunnan, China, **2** Research Institutes of Nutrition and Food Science, Kunming Medical University, Kunming, Yunnan, China, **3** Yunnan Key Laboratory of Nutrition and Food Safety, Kunming, Yunnan, China

✉ These authors contributed equally to this work.

\* [oliverxia2000@aliyun.com](mailto:oliverxia2000@aliyun.com) (XSX); [yinjianzhong2005@sina.com](mailto:yinjianzhong2005@sina.com) (JY)

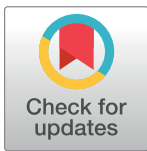

## Abstract

Hepatitis E virus (HEV) infection is relatively high in the southern regions of China. Yunnan, located in southwestern China, has the highest number of ethnic groups. However, HEV infection in the ethnic population is largely unknown. Therefore, we aimed to investigate the seropositive rate, risk factor, and clinical impact of HEV infection in the ethnic groups of Yunnan. We recruited 1912 individuals from four minority groups in three prefectures of Yunnan province. Epidemiological records on potential risk factors for exposure to HEV and blood biochemical index were analyzed. All the serum samples were tested for anti-HEV IgM/IgG by enzyme-linked immunosorbent assay, and the IgM-positive samples were subjected to nested reverse transcription-PCR to detect HEV RNA. Overall, 1273 individuals (66.58%) were positive for anti-HEV IgG, 16 (0.84%) for anti-HEV IgM, and 64 (3.35%) for anti-HEV IgG and IgM both; none of them had detectable HEV RNA. Multivariate analysis revealed a strong statistical association between ethnic origin and HEV IgG seroprevalence. Anti-HEV IgG reactivity in the Hani ethnic (82.3%; 401/487) population was higher than that in the Naxi (71.9%, 340/473), Bulang (65.1%; 302/464), and Wa (60.2%; 294/488) ethnic populations ( $p < 0.0001$ ). Older age and male sex were independently associated with the risk of past HEV infection. Moreover, anti-HEV IgG-positive individuals showed significantly higher levels of total and direct bilirubin and alanine amino transferase but significantly lower levels of globulin and low-density lipoprotein, than the respective levels in anti-HEV IgG-negative individuals. Thus, the seroprevalence of HEV infection is high in the ethnic populations of Yunnan, China. It is therefore necessary to increase the surveillance of specific risk groups and raise awareness about the possible infectious diseases to help limit the HEV transmission here.

## OPEN ACCESS

**Citation:** Feng Y, Feng Y-M, Wang S, Xu F, Zhang X, Zhang C, et al. (2018) High seroprevalence of hepatitis E virus in the ethnic minority populations in Yunnan, China. PLoS ONE 13(5): e0197577. <https://doi.org/10.1371/journal.pone.0197577>

**Editor:** Yury E. Khudyakov, Centers for Disease Control and Prevention, UNITED STATES

**Received:** December 9, 2017

**Accepted:** May 6, 2018

**Published:** May 22, 2018

**Copyright:** © 2018 Feng et al. This is an open access article distributed under the terms of the [Creative Commons Attribution License](https://creativecommons.org/licenses/by/4.0/), which permits unrestricted use, distribution, and reproduction in any medium, provided the original author and source are credited.

**Data Availability Statement:** All relevant data are within the paper and its Supporting Information files.

**Funding:** This work was funded by the Key Project of Yunnan Education Department, 2015Z073, Yue-Mei Feng (data collection and analysis), Applied Basic Research Key Project of Yunnan, 2014FZ008, Jianzhong Yin (decision to publish), Yunnan provincial innovation team project, 2015HC030, Xueshan Xia (preparation of the manuscript), and National key R&D Program of China,

## Introduction

Hepatitis E virus (HEV) is a non-enveloped virus with a single-stranded RNA genome of approximately 7.5 kb and has been classified under the *Orthohepevirus* genus within the

2017YFC0907302, Jianzhong Yin (data collection and analysis).

**Competing interests:** The authors have declared that no competing interests exist.

*Hepeviridae* family [1]. It is considered a major cause of acute viral hepatitis (AVH) [2]. Although HEV infection is usually a self-limiting disease [3], HEV infection in pregnant women can result in severe acute hepatitis or severe complications involving abortion, premature delivery, death of a live-born baby soon after birth, and can sometimes progress to fulminant hepatic failure (FHF) [4]. In addition, recent studies have highlighted that HEV infection is associated with renal injury, acute pancreatitis, hematological diseases, and several neurological disorders [5, 6]. Thus, HEV infection is a global public health concern.

HEV is transmitted efficiently through water, food, and the fecal-oral route [7]. Recently, HEV distribution in the world was shown to exhibit distinct epidemiological patterns, dependent on socioeconomic conditions, sanitation level, potable water, blood transfusion, and occurrence of zoonotic transmission [8]. However, zoonotic spread has recently become the predominant mode of transmission of hepatitis E in China [9]. Zoonotic HEV infections in humans occur via consumption of raw or undercooked meat, raw liver, and sausages; vocational contact; or livestock excreta that results in environmental contamination of agricultural products and seafood [8, 10].

Hepatitis E is more common in developing countries than in the developed countries. China was reported as one of the regions with high HEV infection prevalence and hepatitis E outbreaks occurred in Xinjiang during 1986 to 1988, with a total of 119,280 cases and 707 deaths [11]. Epidemiologic data from China indicate that the prevalence of anti-HEV IgG among different populations was 11% to 49%, including 11.1% in pregnant women [12], 23.5% in general population [13], 26.7% in veterinarians [14], 29.2% in blood donors [11], 39.7% in HIV-infected patients [13], and 48.25% in swine farmers [15].

Previous studies have reported higher anti-HEV IgG prevalence in provinces located in southern China [16], implying that geographical region is an important factor for HEV infection. Yunnan, located in southwestern China, has the highest number of ethnic groups. Twenty-five recognized ethnic groups are found here, and about 38% of the region's population belongs to members of the minorities [17]. However, the prevalence of HEV infection among ethnic populations remains unclear. The present study aimed to investigate the seropositive rate and risk factor for HEV infection and its impact on blood biochemistry in 1912 individuals belonging to different ethnic populations in the rural Yunnan province of China. The resulting data will contribute to a better understanding of the sero-epidemiology of HEV infection in this region and help to develop effective measures to better control HEV infections in the future.

## Materials and methods

### Study population

Serum samples were collected from 1912 individuals from four different ethnic minority groups (Wa, Bulang, Hani, and Naxi) residing in three different prefectures, Lijiang, Lincang, and Honghe, in the year 2015, in Yunnan, China. Of these, 473 cases were from Naxi ethnic, 464 from Bulang ethnic, 488 from Wa ethnic, and 487 from Hani ethnic (Fig 1). A random sample of residents aged 15 years or older was selected from the rural register in Yunnan. The sample was stratified by age and ethnicity, according to the identity card information. Demographic information and data on risk factors for HEV transmission were collected via a questionnaire (S1 and S2 Tables). Moreover, the standard clinical biochemical profiling, including test for liver function, renal function, blood glucose, and blood fat was performed at the time of sampling. The remaining serum samples were aliquoted and stored at -80°C, until further testing.

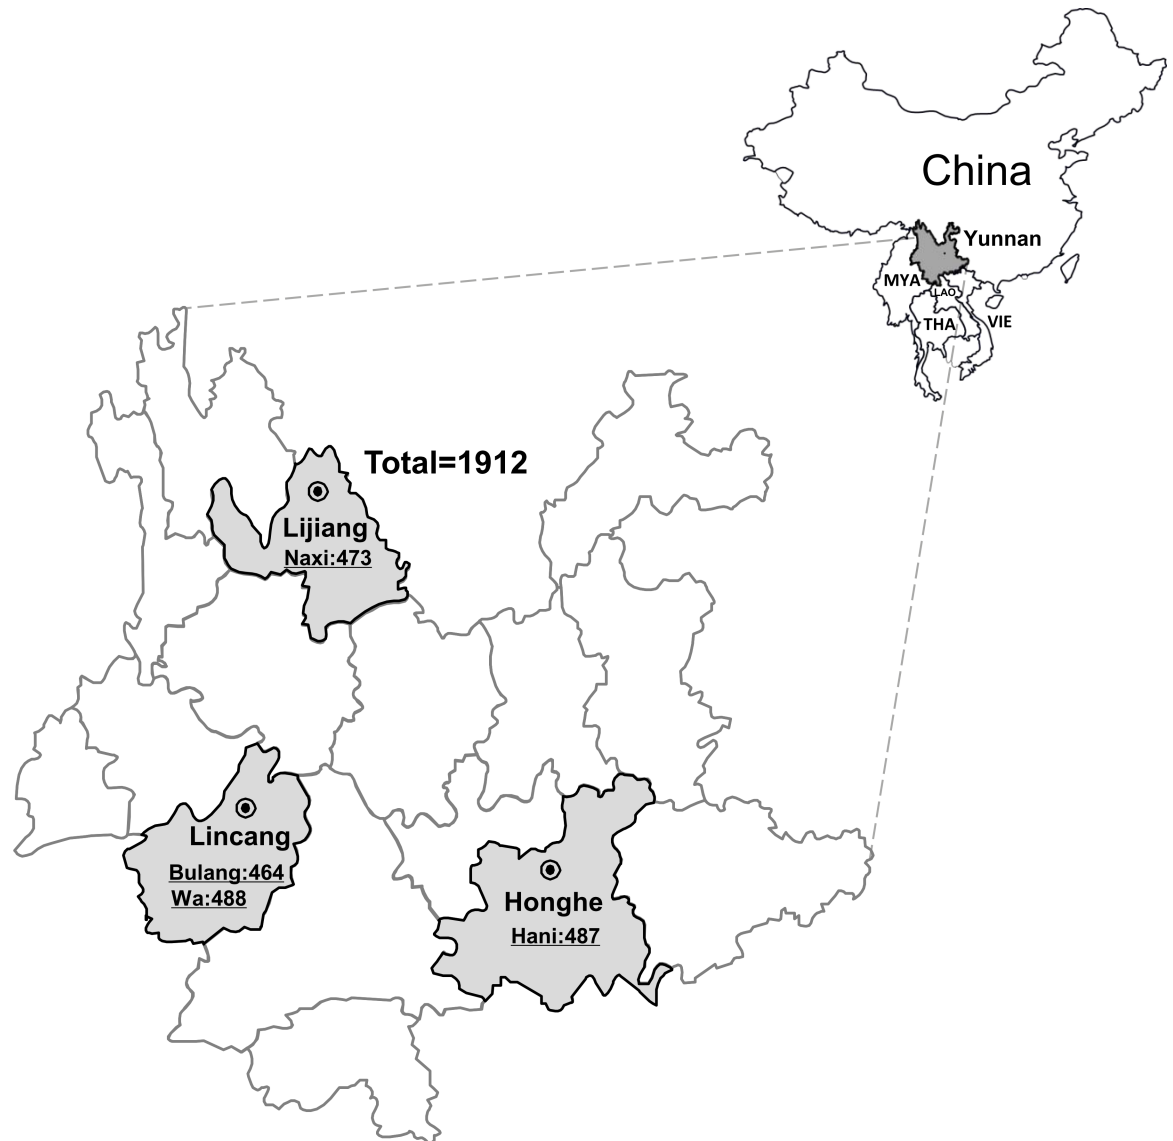

**Fig 1. Maps of the study region and geographical distribution of subjects from all three prefectures of the Yunnan province of southwestern China.** The Yunnan province of southwestern China is marked in dark gray, the Lijiang prefecture, Lincang prefecture, and Honghe prefecture are highlighted in light gray, respectively. MYA: Myanmar; THA: Thailand; LAO: Laos; VIE: Vietnam.

<https://doi.org/10.1371/journal.pone.0197577.g001>

### Ethical statement

Informed consent was obtained from all the subjects before their participation in the study. The study was approved by the Kunming Medical University Ethics Committee. In those under 18 years old, the need for informed consent was explained by the investigator to each participant whose mother or father then signed it in on his/her behalf.

### HEV testing

Serum samples from participants were tested for antibodies against HEV (anti-HEV IgG and anti-HEV IgM) using an enzyme-linked immunosorbent assay kit (Wantai, Beijing, China), according to the manufacturer's instructions. Serum samples positive for anti-HEV IgM were

tested for HEV RNA by nested reverse transcription-PCR (nested RT-PCR), according to a previously published protocol [18].

## Statistical analysis

Statistical analyses were performed using the SPSS 21.0 statistical analysis software package. Data are presented as the mean  $\pm$  SD. Univariable and multivariable logistic regression modeling was performed to analyze the risk factors for HEV IgG seropositivity. The nonparametric Mann Whitney t test was used to compare blood biochemistry data. p values below 0.05 were considered to indicate statistical significance.

## Results

### Demographic characteristics

We screened 1912 participants from three different prefectures (Lijiang, Lincang, and Honghe) of the Yunnan province for the presence of anti-HEV IgG and anti-HEV IgM antibodies (Fig 1). The ratio of males to females was 800:1112. The age of these participants ranged from 15 to 98 years, with a mean age of  $48.79 \pm 14.64$  years. Of the 1912 participants, 25.5% (488) were Wa ethnic, 24.7% (473) were Naxi ethnic, 25.5% (487) were Hani ethnic, and 24.3% (464) were Bulang ethnic. Moreover, the different education levels of the participants were recorded as follows: Illiterate (746/1912, 39.0%); Primary (713/1912, 37.3%); Secondary (350/1912, 18.3%); and College and above (103/1912, 5.4%). For socio-economic level, 72.9% (1393/1912) belonged to the low-income group and 27.1% (519/1912) to the medium-income group. The demographic and epidemiologic data of study participants are shown in S3 Table.

Considering that age may be a very strong confounding factor for HEV seropositivity, the age distributions among the four different minorities are summarized in S1 Fig. The mean age  $\pm$  SD of the Bulang ethnic participations was  $48.8 \pm 14.3$  years,  $49.2 \pm 14.1$  years in the Naxi ethnic population,  $48.7 \pm 15.1$  years in the Bulang ethnic population, and  $48.4 \pm 15.0$  years in the Wa ethnic population, and t test showed that there was no significant difference between the four groups in the age distribution. In addition, the number of participants in the four age groups ( $\leq 30$ , 31–45, 46–60, and  $> 60$ ) was coincident approximately in the four different minorities (S1 Fig). Taken together, our results indicated that no bias was introduced in the age factor.

### Prevalence of anti-HEV antibodies

Of the 1912 plasma samples tested, 1273 (66.58%) were positive for anti-HEV IgG, 16 (0.84%) were positive for anti-HEV IgM, and 64 (3.35%) were positive for both anti-HEV IgG and IgM (Fig 2). However, none of the IgM-positive samples were positive for HEV RNA. The prevalence rates for IgG, IgM, and both were 79.47% (387/487), 0.21% (1/487), and 2.87% (14/487) in the Hani ethnic population; 68.92% (326/473), 1.27% (6/473), and 2.96% (14/487) in the Naxi ethnic population; 62.07% (288/464), 0.86% (4/464), and 3.02% (14/464) in the Bulang ethnic population; and 55.74% (272/488), 1.02% (5/488), and 4.51% (22/488) in the Wa ethnic population, respectively (Fig 2). The prevalence of IgG in the Hani, Naxi, and Bulang ethnic populations was significantly higher than that in the Wa ethnic population ( $p < 0.001$ ).

### Risk factors for HEV infection in ethnic minority populations

To investigate the risk factors for HEV infection in the study cohort, only the samples with the most common HEV antibody serotype, i.e., IgG-seropositive samples, were analyzed; samples positive for IgM and both IgG and IgM were not included because of the limited number of individuals. Univariable analysis revealed that HEV IgG prevalence was associated with

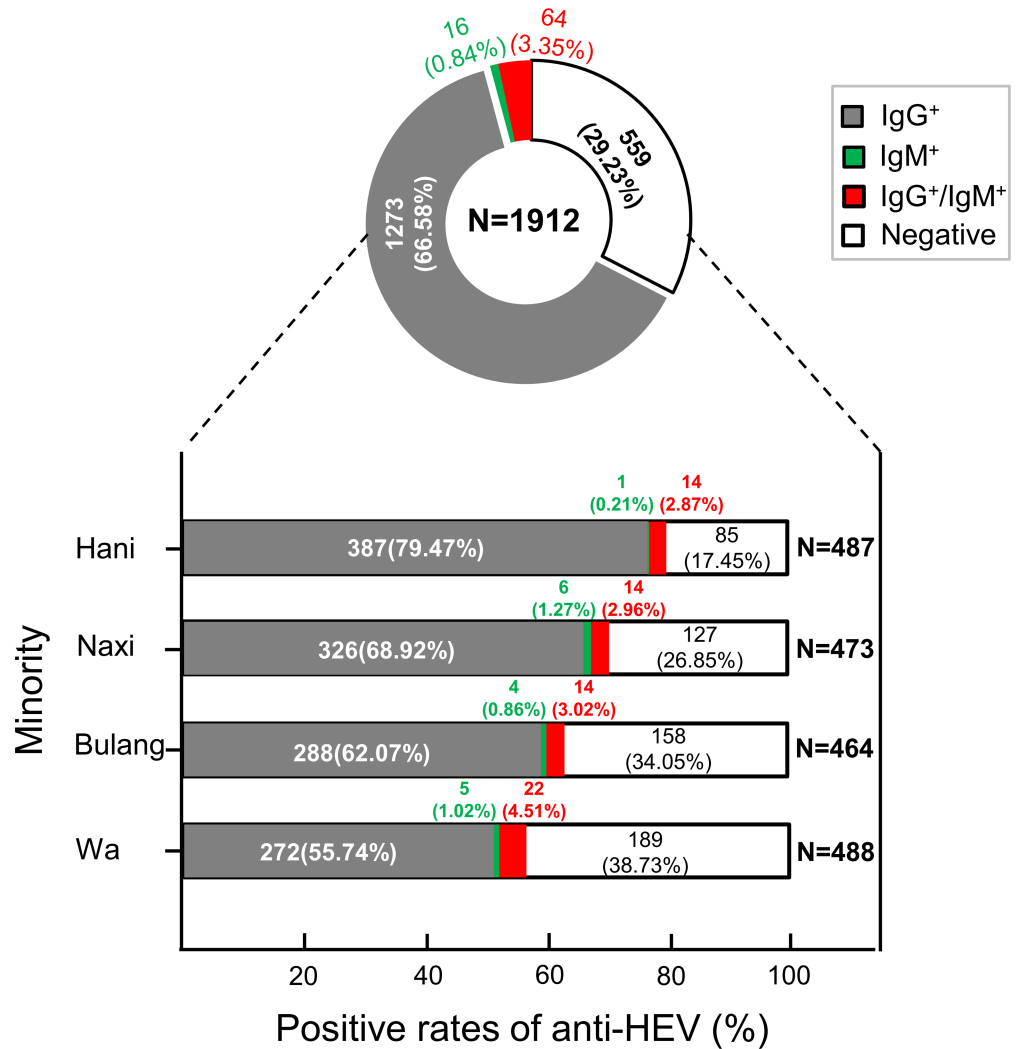

**Fig 2. Comparison of anti-HEV IgM/IgG seropositivity distributions among four different ethnic groups in Yunnan, China.** The different seropositivities are shown in different colors, the anti-HEV IgG+ is marked in gray, anti-HEV IgM+ is highlighted in dark blue, and anti-HEV IgG and IgM co-positive is marked in red.

<https://doi.org/10.1371/journal.pone.0197577.g002>

gender, age, ethnic origin, education level, smoking habit, body fat ratio, and visceral fat index (Table 1). In multivariate analysis, gender, age, and ethnic origin remained independent predictors for anti-HEV IgG seropositivity. HEV IgG prevalence in males was significantly higher than that in females ( $p = 0.001$ ). The prevalence increased with increasing age and was the highest (77.9%; 328/421) in individuals above 60 years ( $p < 0.001$ ). Moreover, there was a strong statistical association between ethnic origin and HEV IgG seroprevalence. Anti-HEV IgG reactivity in the Hani ethnic (82.3%; 401/487) population was higher than that in the Naxi (71.9%, 340/473), Bulang (65.1%; 302/464), and Wa (60.2%; 294/488) ethnic populations ( $p < 0.0001$ ).

### Blood biochemical characteristics of HEV-infected patients

Biochemical analysis of the blood samples showed that individuals positive for HEV IgG had significantly higher levels of total and direct bilirubin (TBIL and DBIL) and alanine amino

**Table 1. Results from logist regression of anti-HEV IgG seropositivity.**

| Variable                    | No.tested | HEV IgG seropositive |                  | Univariate Analysis |         | Multivariate Analysis |         |  |
|-----------------------------|-----------|----------------------|------------------|---------------------|---------|-----------------------|---------|--|
|                             |           | n                    | %(95% CI)        | OR (95% CI)         | p-value | OR (95% CI)           | p-value |  |
| <b>Gender</b>               |           |                      |                  |                     |         |                       |         |  |
| Male                        | 800       | 588                  | 73.5 (70.4–76.6) | 1                   |         |                       |         |  |
| Female                      | 1112      | 749                  | 67.4 (64.6–70.1) | 0.744 (0.609–0.909) | 0.004   | 0.707 (0.572–0.875)   | 0.001   |  |
| <b>Age</b>                  |           |                      |                  |                     |         |                       |         |  |
| ≤30                         | 235       | 104                  | 44.3 (37.9–50.6) | 1                   |         |                       |         |  |
| 31–45                       | 561       | 364                  | 64.9 (60.9–68.8) | 2.327(1.706–3.174)  | <0.001  | 2.123(1.541–2.925)    | <0.000  |  |
| 46–60                       | 695       | 541                  | 77.8 (74.8–80.9) | 4.425(3.234–6.055)  | <0.001  | 4.013(2.903–5.548)    | <0.001  |  |
| >60                         | 421       | 328                  | 77.9 (73.9–81.9) | 4.443(3.145–6.275)  | <0.001  | 4.489(3.107–6.485)    | <0.001  |  |
| <b>Ethnic</b>               |           |                      |                  |                     |         |                       |         |  |
| Wa                          | 488       | 294                  | 60.2 (55.9–64.6) | 1                   |         |                       |         |  |
| Bulang                      | 464       | 302                  | 65.1 (60.7–69.4) | 1.230(0.945–1.601)  | 0.123   | 1.336(1.015–1.758)    | 0.039   |  |
| Naxi                        | 473       | 340                  | 71.9 (67.8–75.9) | 1.687(1.287–2.210)  | <0.001  | 1.571(1.175–2.100)    | 0.002   |  |
| Hani                        | 487       | 401                  | 82.3 (79.0–85.7) | 3.077(2.290–4.133)  | <0.001  | 2.969(2.188–4.030)    | <0.001  |  |
| <b>Education Level</b>      |           |                      |                  |                     |         |                       |         |  |
| Illiterate                  | 746       | 553                  | 74.1 (71.0–77.3) | 1                   |         |                       |         |  |
| Primary                     | 713       | 492                  | 69.0 (65.6–72.4) | 0.777(0.618–0.976)  | 0.03    |                       |         |  |
| Secondary                   | 350       | 233                  | 66.6 (61.6–71.5) | 0.695(0.527–0.916)  | 0.01    |                       |         |  |
| College and above           | 103       | 59                   | 57.3 (47.7–66.8) | 0.468(0.306–0.715)  | <0.001  |                       |         |  |
| <b>Socio-economic level</b> |           |                      |                  |                     |         |                       |         |  |
| Low                         | 1393      | 986                  | 70.8 (68.4–73.2) | 1                   |         |                       |         |  |
| Medium                      | 519       | 351                  | 67.6 (63.6–71.7) | 0.862 (0.694–1.072) | 0.182   |                       |         |  |
| <b>Drinking</b>             |           |                      |                  |                     |         |                       |         |  |
| No                          | 1130      | 780                  | 69.0 (66.3–71.7) | 1                   |         |                       |         |  |
| Yes                         | 782       | 557                  | 71.2 (68.1–74.4) | 1.111 (0.910–1.356) | 0.302   |                       |         |  |
| <b>Smoking</b>              |           |                      |                  |                     |         |                       |         |  |
| No                          | 1279      | 864                  | 67.6 (65.0–70.1) | 1                   |         |                       |         |  |
| Yes                         | 633       | 473                  | 74.7 (71.3–78.1) | 1.420 (1.146–1.759) | 0.001   |                       |         |  |
| <b>Labor intensity</b>      |           |                      |                  |                     |         |                       |         |  |
| Normal                      | 688       | 467                  | 67.9 (64.4–71.4) | 1                   |         |                       |         |  |

(Continued)

Table 1. (Continued)

| Variable | No. tested | HEV IgG seropositive |                  | Univariate Analysis |         | Multivariate Analysis |         |
|----------|------------|----------------------|------------------|---------------------|---------|-----------------------|---------|
|          |            | n                    | % (95% CI)       | OR (95% CI)         | p-value | OR (95% CI)           | p-value |
| High     | 1224       | 870                  | 71.1 (68.5–73.6) | 1.163 (0.950–1.424) | 0.143   | 1.399 (1.109–1.765)   | 0.005   |

**Education level**, Illiterate: no education; Primary: 1–6 years of education; Secondary: 7–9 years; College and above: more than 9 years.

**Socio-economic level**, Low: less than 30,000 RBM of average annual income; Medium: 30,000–50,000 RBM.

**Drinking**, No: never or occasionally drink; Yes: often or every day.

**Smoking**, No: never or occasionally smoke; Yes: often or every day.

**Labor intensity**, Normal: no exhaustion; High: exhaustion.

<https://doi.org/10.1371/journal.pone.0197577.t001>

transferase (ALT) but significantly lower levels of globulin (GLO) and low-density lipoprotein, than those negative for HEV IgG (Table 2).

## Discussion

HEV is a small RNA virus that causes acute viral hepatitis and is transmitted enterically. Although HEV infection has been reported to be higher in southern regions of China, the HEV infection in the ethnic population of China is largely unknown. In the present study, we evaluated the seropositive rate, risk factors, and clinical impact of HEV infection in 1912 individuals belonging to ethnic minorities in rural Yunnan province of China. A high prevalence of anti-HEV IgG (66.58%) was found in the cohort studied, and this prevalence was comparable to that reported in Egyptian villages (67.7%) [19]. The prevalence revealed in this study is

Table 2. Blood biochemical characteristics of ethnic minority populations according to anti-HEV IgG status.

| Biochemistry indexes          | Anti-HEV IgG positive N = 1337    | Anti-HEV IgG negative N = 575 | p-value        |                 |
|-------------------------------|-----------------------------------|-------------------------------|----------------|-----------------|
| <b>Liver function</b>         | Total bilirubin (umol/L)          | 6.59 ± 4.14                   | 6.34 ± 3.94    | <b>0.0408</b>   |
|                               | Direct bilirubin (umol/L)         | 3.07 ± 1.55                   | 2.90 ± 1.50    | <b>0.0025</b>   |
|                               | Indirect bilirubin (umol/L)       | 3.52 ± 2.93                   | 3.44 ± 2.79    | 0.5504          |
|                               | Total protein (g/L)               | 73.67 ± 5.36                  | 73.87 ± 5.24   | 0.4797          |
|                               | Albumin (g/L)                     | 41.73 ± 3.18                  | 41.45 ± 3.15   | 0.0554          |
|                               | Globulin (g/L)                    | 31.93 ± 3.63                  | 32.43 ± 3.47   | <b>0.0062</b>   |
|                               | A/G                               | 1.32 ± 0.17                   | 1.29 ± 0.16    | < <b>0.0001</b> |
|                               | Alanine amino transferase (U/L)   | 15.47 ± 9.70                  | 14.58 ± 9.28   | <b>0.0366</b>   |
|                               | Aspartate amino transferase (U/L) | 27.60 ± 16.61                 | 27.13 ± 14.66  | 0.9837          |
|                               | AST/ALT                           | 2.29 ± 1.71                   | 2.44 ± 2.09    | 0.0282          |
|                               | Alkaline phosphatase (U/L)        | 78.34 ± 26.40                 | 78.74 ± 26.96  | 0.9626          |
| Glutamyl transpeptidase (U/L) | 46.18 ± 91.40                     | 43.81 ± 73.38                 | 0.2702         |                 |
| <b>Renal function</b>         | Urea (umol/L)                     | 5.16 ± 1.44                   | 5.12 ± 1.47    | 0.5257          |
|                               | Creatinine (umol/L)               | 73.28 ± 14.38                 | 73.06 ± 14.70  | 0.7119          |
|                               | Uric acid (umol/L)                | 256.59 ± 66.02                | 257.85 ± 66.71 | 0.8172          |
| <b>Blood glucose</b>          | Glucose (mmol/L)                  | 4.83 ± 1.03                   | 4.80 ± 1.15    | 0.1494          |
| <b>Blood fat</b>              | Total cholesterol (mmol/L)        | 4.88 ± 1.04                   | 4.92 ± 1.01    | 0.3903          |
|                               | Triglyceride (mmol/L)             | 2.14 ± 1.51                   | 2.06 ± 1.44    | 0.2492          |
|                               | High density lipoprotein (mmol/L) | 1.34 ± 0.31                   | 1.34 ± 0.31    | 0.8038          |
|                               | Low density lipoprotein (mmol/L)  | 2.77 ± 0.81                   | 2.85 ± 0.83    | <b>0.0436</b>   |

<https://doi.org/10.1371/journal.pone.0197577.t002>



higher than that reported after similar investigations in the general population of the Netherlands (28.7%) [20], rural Taiwan (29.5%) [21], rural Mexico (36.6%) [22], and Cambodia (18.4%) [23], but lower than the seroprevalence of HEV infection among pregnant women in Egypt (84.3%) [24]. Moreover, the overall prevalence rate of anti-HEV IgM was 0.84% in our study, implying a low level of recent infection, which is in accordance with other previous reports stating that HEV IgM prevalence is about 0.5–5% among healthy blood donors [11]. HEV RNA was not seen in any of the anti-IgM-positive serum samples. These findings are consistent with the results from previous studies [12, 20, 25]. This may be attributed to the low viral load and/or the transient existence of viremia in the serum samples.

The present study demonstrated that prevalence of anti-HEV IgG increased with increasing age, and was significantly higher in men than in women; these findings are in agreement with several previous studies [8,20,21,26], suggesting that as a general rule, older age and male sex were independently associated with the risk of past HEV infection. This may be because these populations had cumulative exposure to HEV.

Previous study has demonstrated that the performance of anti-HEV IgG assays played a role in the difference of prevalence [26]. Among the anti-HEV EIA assay, Wantai assay has the most reliable estimate of the HEV seroprevalence [20] and greater sensitivity than others [8]. In addition, previously reported a lot of data of HEV seroprevalence were obtained from Wantai assay [11–15]. Given that the seroprevalence data in the HEV epidemiological studies should be compared, present studies using Wantai assays investigated HEV seroprevalence. Therefore, we presented the seroprevalence of HEV are more accurate and reliable.

Notably, we found a strong statistical association between ethnic origin and HEV IgG seroprevalence. Our data also indicate that this cohort had a significantly higher risk of being seropositive for HEV than that of other populations, including blood donors [11], HIV-infected patients [13], pregnant women [12], swine farmers [15], farmers [15], and veterinarians in China [14]. These findings imply that the ethnic minority population was more easily exposed to active HEV.

HEV mainly spreads via fecal-oral transmission through contaminated water and poor sanitation, zoonotic transmission, and foodborne transmission. Indeed, mixed farming of domestic animals is a common practice in Yunnan, China [27]. Almost all the farmers in the ethnic minority areas studied raise livestock and/or poultry such as pigs, cattle, goats, dogs, chickens, ducks, and geese in their homes. In fact, HEV-related viruses have been found in pigs, goats, chickens, and wild rats and several studies have demonstrated high prevalence of HEV infection in pigs, goats, and dogs in Yunnan [28, 29]. Another reason for high HEV IgG prevalence in the ethnic minority population may be the habit of eating undercooked or raw meat and drinking raw milk from cows and goats [30, 31]. It was recently reported that excretion of HEV into milk in cows imposes high risks of zoonosis [27]. HEV IgG prevalence was the highest in the Hani ethnic population (82.3%; 401/487) because of the habit of eating raw pork liver and fresh blood from pigs, goats, and dogs [32]. However, because the risk factors (eating raw meat, drinking raw milk from cows and goats, drinking water source, and so on) for HEV infection are not well defined, data for risk factor assessment could not be collected during the study; therefore we could not conclusively evaluate the route of transmission or the extent of zoonotic HEV infections and the role of consumption of uncooked or undercooked meats in HEV infections in the ethnic minority population. Further molecular epidemiological surveys are essential to monitor the epidemiology of HEV among the livestock and poultry and to collect more data, including that on occupation, raising farm animals, pet ownership, pork meat consumption, unpasteurized cow/goat milk consumption, and untreated water consumption, to determine the route of HEV transmission.



The present study indicates that high labor intensity is an important factor that increases HEV force of infection. In the rural areas of Yunnan, farmers' high strength manual labor is mainly concentrated in the breeding and planting of rice [33]. The participants with high strength manual labor usually are from poor families. Thus we speculate that high labor intensity is associated with an insanitary environment, such as insanitary water sources and food. An insanitary environment can increase the chance of contaminating water and food with HEV.

Furthermore, in the present study, we examined the biochemical liver functions, renal function, blood glucose, and blood fat, according to anti-HEV IgG status. Although there were significant differences in liver function indicators (TBIL, DBIL, GLO, and ALT) between anti-HEV IgG-positive group and IgG-negative group, these values were all within the normal range, indicating that the population was previously infected with HEV and showed no liver damage.

There were some limitations to this study. First, our study lacked a long-term follow-up epidemiological survey of HEV. Second, the information from questionnaires and interviews was limited; therefore, we could not comprehensively evaluate the risk factors. Third, the lack of HEV RNA detection made it impossible to analyze the HEV genotypes in the ethnic minority population of Yunnan, China.

## Conclusions

In conclusion, our data suggest that the seroprevalence of HEV infection among the ethnic minority population in Yunnan is extremely common. To the best of our knowledge, this is the first large-scale HEV epidemiological survey in Yunnan. It provides endemically representative data and describes the current situation of sporadic HEV infection in the ethnic minority groups in Yunnan. These findings highlight the urgency of increasing efforts aimed at monitoring and prevention of HEV and increase the awareness of this disease to better control HEV transmission here.

## Supporting information

**S1 Table. English version of the questionnaire in this study.**  
(PDF)

**S2 Table. Chinese version of the questionnaire in this study.**  
(PDF)

**S3 Table. Demographic characteristics of study participants.**  
(DOCX)

**S1 Fig. The age distribution in the four different minorities.** The mean age  $\pm$  SD of the four different minorities was displayed at the top of the graph. The four age groups ( $\leq 30$ , 31–45, 46–60, and  $>60$ ) of the different minorities are separated by red dotted lines. The number and percentage of participants of each minority is shown in different colors, Hani is marked in blue, Naxi is highlighted in green, Bulang is marked in black, and Wa is highlighted in red.  
(TIF)

## Author Contributions

**Conceptualization:** Yue Feng, Yue-Mei Feng, Xueshan Xia, Jianzhong Yin.

**Formal analysis:** Yue Feng, Yue-Mei Feng.

**Funding acquisition:** Yue-Mei Feng, Xueshan Xia, Jianzhong Yin.

**Investigation:** Songmei Wang, Fang Xu, Xuehui Zhang.

**Methodology:** Yue Feng, Chunyue Zhang, Yuanyuan Jia, Wanru Yang.

**Supervision:** Jianzhong Yin.

**Writing – original draft:** Yue Feng, Yue-Mei Feng.

**Writing – review & editing:** Yue Feng, Yue-Mei Feng, Songmei Wang, Fang Xu, Xuehui Zhang, Chunyue Zhang, Yuanyuan Jia, Wanru Yang, Xueshan Xia, Jianzhong Yin.

## References

1. Debing Y, Moradpour D, Neyts J, Gouttenoire J. Update on hepatitis E virology: Implications for clinical practice. *J Hepatol*. 2016; 65(1):200–212. <https://doi.org/10.1016/j.jhep.2016.02.045> PMID: 26966047
2. Ankcorn M, JTedder R S. Hepatitis E: the current state of play. *Transfus Med*. 2017; 27(2):84–95. <https://doi.org/10.1111/tme.12405> PMID: 28382704
3. Kamar N, Izopet J, Pavio N, Aggarwal R, Labrique A, Wedemeyer H, et al. Hepatitis E virus infection. *Nat Rev Dis Primers*. 2017; 3:17086. <https://doi.org/10.1038/nrdp.2017.86> PMID: 29154369
4. ShalimarAcharya S K. Hepatitis e and acute liver failure in pregnancy. *J Clin Exp Hepatol*. 2013; 3(3):213–24. <https://doi.org/10.1016/j.jceh.2013.08.009> PMID: 25755503
5. Bazerbachi F, Haffar S, Garg S, KLake J R. Extra-hepatic manifestations associated with hepatitis E virus infection: a comprehensive review of the literature. *Gastroenterol Rep (Oxf)*. 2016; 4(1):1–15.
6. Zhou X, Huang F, Xu L, Lin Z, de Vrij F M S, Ayo-Martin A C, et al. Hepatitis E Virus Infects Neurons and Brains. *J Infect Dis*. 2017; 215(8):1197–1206. <https://doi.org/10.1093/infdis/jix079> PMID: 28199701
7. Mirazo S, Ramos N, Mainardi V, Gerona S, Arbiza J. Transmission, diagnosis, and management of hepatitis E: an update. *Hepat Med*. 2014; 6:45–59. <https://doi.org/10.2147/HMER.S63417> PMID: 24966702
8. Yoon Y, Jeong H S, Yun H, Lee H, Hwang Y S, Park B, et al. Hepatitis E Virus (HEV) seroprevalence in the general population of the Republic of Korea in 2007–2009: a nationwide cross-sectional study. *BMC Infect Dis*. 2014; 14:517.
9. Khuroo M, SKhuroo N S. Transmission of Hepatitis E Virus in Developing Countries. *Viruses*. 2016; 8(9): 253.
10. Pavio N, Doceul V, Bagdassarian E, Johne R. Recent knowledge on hepatitis E virus in Suidae reservoirs and transmission routes to human. *Vet Res*. 2017; 48(1):78. <https://doi.org/10.1186/s13567-017-0483-9> PMID: 29157309
11. Wang M, Fu P, Yin Y, He M, Liu Y. Acute, Recent and Past HEV Infection among Voluntary Blood Donors in China: A Systematic Review and Meta-Analysis. *PLoS One*. 2016; 11(9):e0161089. <https://doi.org/10.1371/journal.pone.0161089> PMID: 27597991
12. Gu G, Huang H, Zhang L, Bi Y, Hu Y, Zhou Y H. Hepatitis E virus seroprevalence in pregnant women in Jiangsu, China, and postpartum evolution during six years. *BMC Infect Dis*. 2015; 15:560. <https://doi.org/10.1186/s12879-015-1308-y> PMID: 26653888
13. Zeng H, Wang L, Liu P, Liao L, Shao Y. Seroprevalence of hepatitis E virus in HIV-infected patients in China. *AIDS*. 2017; 31(14):2019–2021. <https://doi.org/10.1097/QAD.0000000000001585> PMID: 28692547
14. Kang Y H, Cong W, Zhang X Y, Wang C F, Shan X F, Qian A D. Hepatitis E virus seroprevalence among farmers, veterinarians and control subjects in Jilin province, Shandong province and Inner Mongolia Autonomous Region, China. *J Med Virol*. 2017; 89(5):872–877. <https://doi.org/10.1002/jmv.24693> PMID: 27664799
15. Liang H, Su S, Deng S, Gu H, Ji F, Wang L, et al. The prevalence of hepatitis E virus infections among swine, swine farmers and the general population in Guangdong Province, China. *PLoS One*. 2014; 9(2):e88106. <https://doi.org/10.1371/journal.pone.0088106> PMID: 24520348
16. Ren F, Zhao C, Wang L, Wang Z, Gong X, Song M, et al. Hepatitis E virus seroprevalence and molecular study among blood donors in China. *Transfusion*. 2014; 54(3 Pt 2):910–7.
17. <https://en.wikipedia.org/wiki/Yunnan>.
18. Liu P, Bu Q N, Wang L, Han J, Du R J, Lei Y X, et al. Transmission of hepatitis E virus from rabbits to cynomolgus macaques. *Emerg Infect Dis*. 2013; 19(4):559–65. <https://doi.org/10.3201/eid1904.120827> PMID: 23628346

19. Stoszec S K, Engle R E, Abdel-Hamid M, Mikhail N, Abdel-Aziz F, Medhat A, et al. Hepatitis E antibody seroconversion without disease in highly endemic rural Egyptian communities. *Trans R Soc Trop Med Hyg.* 2006; 100(2):89–94. <https://doi.org/10.1016/j.trstmh.2005.05.019> PMID: 16257427
20. van Gageldonk-Lafeber A B, van der Hoek W, Borlee F, Heederik D J, Mooi S H, Maassen C B, et al. Hepatitis E virus seroprevalence among the general population in a livestock-dense area in the Netherlands: a cross-sectional population-based serological survey. *BMC Infect Dis.* 2017; 17(1):21. <https://doi.org/10.1186/s12879-016-2160-4> PMID: 28056844
21. Alvarado-Esquivel C, Sanchez-Anguiano L, Hernandez-Tinoco J. Seroepidemiology of hepatitis e virus infection in general population in rural durango, Mexico. *Hepat Mon.* 2014; 14(6):e16876. <https://doi.org/10.5812/hepatmon.16876> PMID: 24976837
22. Yamada H, Takahashi K, Lim O, Svay S, Chuon C, Hok S, et al. Hepatitis E Virus in Cambodia: Prevalence among the General Population and Complete Genome Sequence of Genotype 4. *PLoS One.* 2015; 10(8):e0136903. <https://doi.org/10.1371/journal.pone.0136903> PMID: 26317620
23. Stoszec S K, Abdel-Hamid M, Saleh D A, El Kafrawy S, Narooz S, Hawash Y, et al. High prevalence of hepatitis E antibodies in pregnant Egyptian women. *Trans R Soc Trop Med Hyg.* 2006; 100(2):95–101. <https://doi.org/10.1016/j.trstmh.2004.12.005> PMID: 16257426
24. Mellgren A, Karlsson M, Lagging M, Wejstal R, Norder H. High seroprevalence against hepatitis E virus in patients with chronic hepatitis C virus infection. *J Clin Virol.* 2017; 88:39–45. <https://doi.org/10.1016/j.jcv.2017.01.005> PMID: 28160727
25. Lee J T, Shao P L, Chang L Y, Xia N S, Chen P J, Lu C Y, et al. Seroprevalence of Hepatitis E Virus Infection among Swine Farmers and the General Population in Rural Taiwan. *PLoS One.* 2013; 8(6):e67180. <https://doi.org/10.1371/journal.pone.0067180> PMID: 23840620
26. Passos-Castilho A M, Reinaldo M R, Sena A, Granato C F H. High prevalence of hepatitis E virus antibodies in Sao Paulo, Southeastern Brazil: analysis of a group of blood donors representative of the general population. *Braz J Infect Dis.* 2017; 21(5):535–539. <https://doi.org/10.1016/j.bjid.2017.05.004> PMID: 28606414
27. Huang F, Li Y, Yu W, Jing S, Wang J, Long F, et al. Excretion of infectious hepatitis E virus into milk in cows imposes high risks of zoonosis. *Hepatology.* 2016; 64(2):350–9. <https://doi.org/10.1002/hep.28668> PMID: 27286751
28. Long F, Yu W, Yang C, Wang J, Li Y, Huang F. High prevalence of hepatitis E virus infection in goats. *J Med Virol.* 2017; 89(11):1981–1987. <https://doi.org/10.1002/jmv.24843> PMID: 28464334
29. Zeng M Y, Gao H, Yan X X, Qu W J, Sun Y K, Fu G W, et al. High hepatitis E virus antibody positive rates in dogs and humans exposed to dogs in the south-west of China. *Zoonoses Public Health.* 2017; 64(8):684–688. <https://doi.org/10.1111/zph.12377> PMID: 28714127
30. <https://www.travelchinaguide.com/intro/nationality/blang/>.
31. <http://www.bbc.com/news/magazine-18102880>.
32. <https://www.chinatravel.com/facts/hani-ethnic-minority.htm>.
33. <http://www.mekonginfo.org/assets/midocs/0002325-farming-upland-agriculture-yunnan-china.Pdf>.
