# Supplementary material for: High seroprevalence of hepatitis E virus in the ethnic minority populations in Yunnan, China
Source: PubMed Central journal article supplement (PMC5963781; doi:10.1371/journal.pone.0197577), 2018-05-22
Supplement: pone.0197577.s001.pdf [file pone.0197577.s001.pdf]

# Questionnaire survey

Inquirer number: \_\_\_\_\_

Date: \_\_\_\_/\_\_\_\_/\_\_\_\_ (dd/mm/yy)

Investigation site: Yunnan province \_\_\_\_\_ prefecture \_\_\_\_\_ village \_\_\_\_\_

## 一、 Basic information

- 1 、 Gender: ①man        ②woman
- 2 、 Date of birth: \_\_\_\_/\_\_\_\_/\_\_\_\_ (dd/mm/yy)
- 3 、 Age: \_\_\_\_years; height: \_\_\_\_cm; weight: \_\_\_\_kg;
- 4 、 Marital status: ①unmarried ②married ③widowed ④divorced ⑤other
- 5 、 Occupation: ①farmer ②teacher ③worker ④other
- 6 、 Education Level: ①Illiterate ②Primary(1-6 years) ③Secondary(7-9 years)  
④College and above (>9 years)
- 7 、 Nationality: ① Hani ② Naxi ③ Wa ④ Bulang
- 8 、 Labor intensity: ①Normal (No exhaustion) ②high (exhausted)
- 9 、 Average annual income: \_\_\_\_\_RMB

## 二、 Living and eating habits.

- 1 、 Do you smoke tobacco?  
① Yes(never or occasionally) ② No (often or every day)
- 2、 Do you have a drinking habit?  
① Yes(never or occasionally) ② No (often or every day)
- 3、 Do you keep a pet?  
①Yes                    ②No
- 4、 Do you raise livestock?  
①Yes                    ②No
- 5、 What is your source of drinking water?  
① mineral water ② underground water
- 6、 What food do you often eat? (multiselect)  
①pork ②beef ③fish ④mutton ⑤Blood and/or guts ⑥vegetables ⑦other
