# Supplementary material for: High seroprevalence of hepatitis E virus in the ethnic minority populations in Yunnan, China
Source: PLoS One. 2018 May 22;13(5):e0197577. doi: 10.1371/journal.pone.0197577 (PMC5963781; doi:10.1371/journal.pone.0197577)
Supplement: S2 Table — (PDF) [file pone.0197577.s002.pdf]

# 云南少数民族问卷调查

询问者编号:\_\_\_\_\_

调查时间: \_\_\_\_\_年 \_\_\_\_\_月 \_\_\_\_\_日

调查地点: 云南省\_\_\_\_\_县\_\_\_\_\_乡(镇) \_\_\_\_\_村

## 一、基本情况

- 1、性别: ①男            ②女
- 2、出生日期: (以阳历计) \_\_\_\_\_年\_\_\_\_\_月\_\_\_\_\_日
- 3、年龄: \_\_\_\_\_岁; 身高: \_\_\_\_\_厘米; 体重: \_\_\_\_\_公斤
- 4、婚姻状况: ①未婚            ②已婚            ③丧偶            ④离异            ⑤其他
- 5、职业: ①农民            ②教师            ③工人            ④其他
- 6、文化程度: ①文盲            ②小学(1-6年)            ③中学(7-9年)            ④大专及以上 (>9年)
- 7、民族: ①哈尼族            ②纳西族            ③佤族            ④布朗族
- 8、体力劳动强度: ①正常 (无疲惫感)            ②高 (有疲惫感)
- 9、家庭年收入: \_\_\_\_\_元

## 二、生活和饮食习惯

- 1、您是否吸烟?            ①是 (从不或偶尔)            ②否 (经常或每天)
- 2、您有饮酒习惯吗?            ①是 (从不或偶尔)            ②否 (经常或每天)
- 3、您是否饲养宠物?            ①是            ②否
- 4、您是否饲养家畜?            ①是            ②否
- 5、您的饮水来源是?            ①矿泉水            ②地下水
- 6、您经常吃以下哪些食物? (多选)
  - ①猪肉            ②牛肉            ③鱼            ④羊肉            ⑤血、内脏            ⑥蔬菜            ⑦其他
